# Supplementary figures and images for: Riverbed methanotrophy sustained by high carbon conversion efficiency
Source: PubMed Central journal article supplement — ISME J. 2015 Jun 9;9(10):2304–14. doi: 10.1038/ismej.2015.98 (PMC4579481; doi:10.1038/ismej.2015.98), 2015-06-09

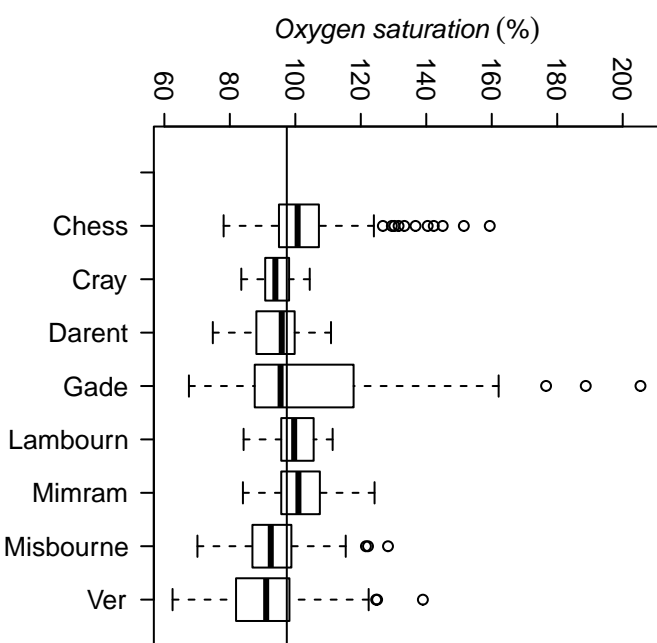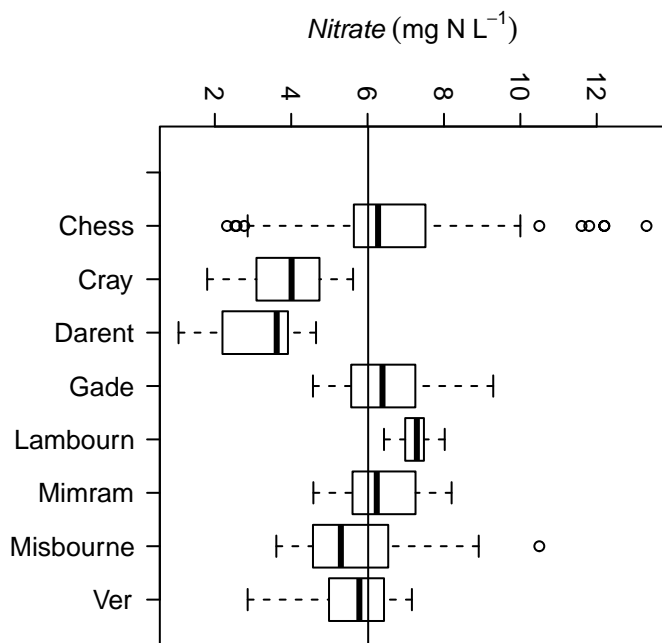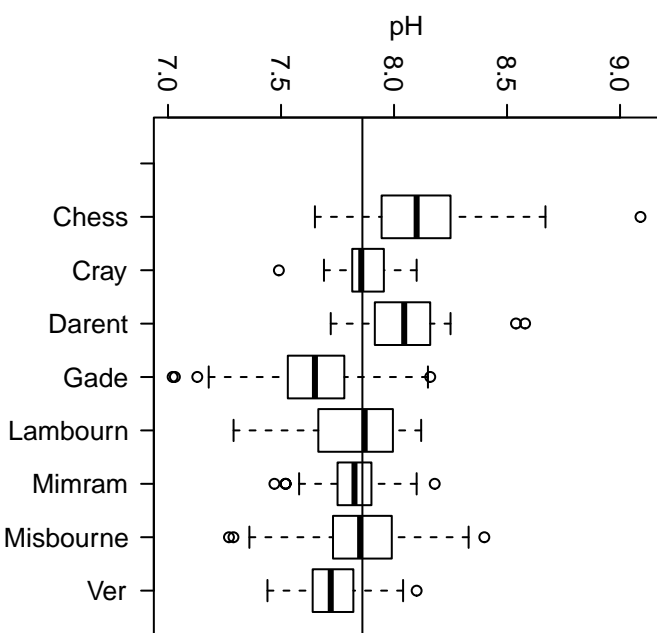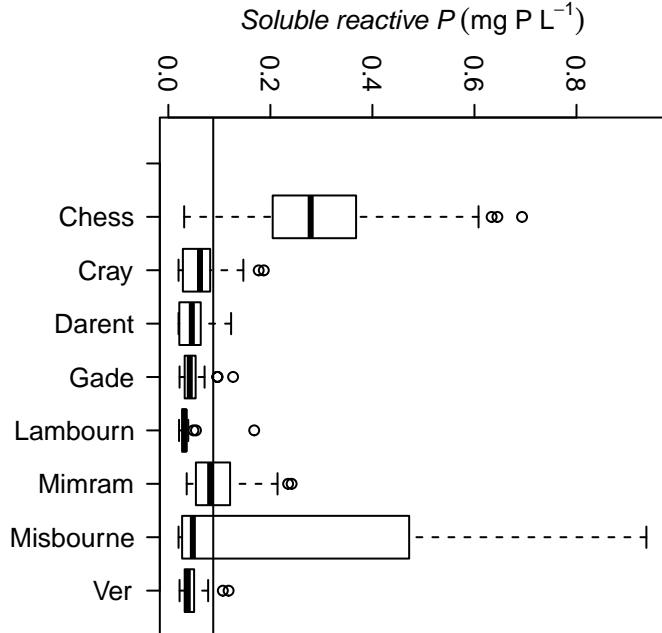

Supplement: ismej201598x2.pdf [file ismej201598x2.pdf]

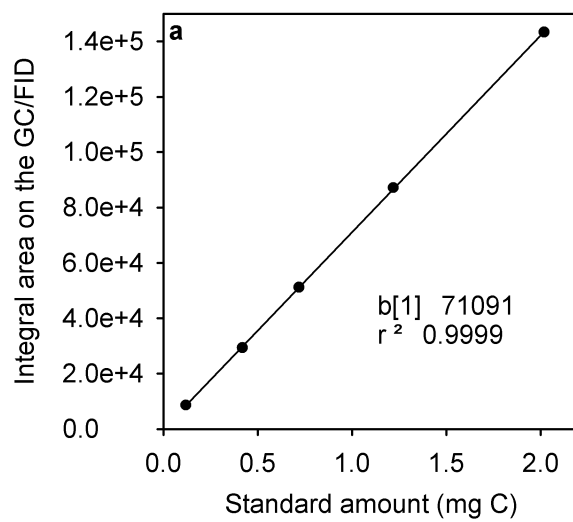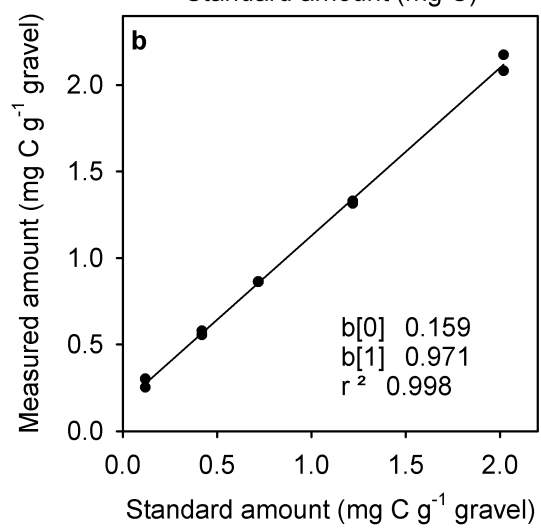

Supplement: ismej201598x3.pdf [file ismej201598x3.pdf]

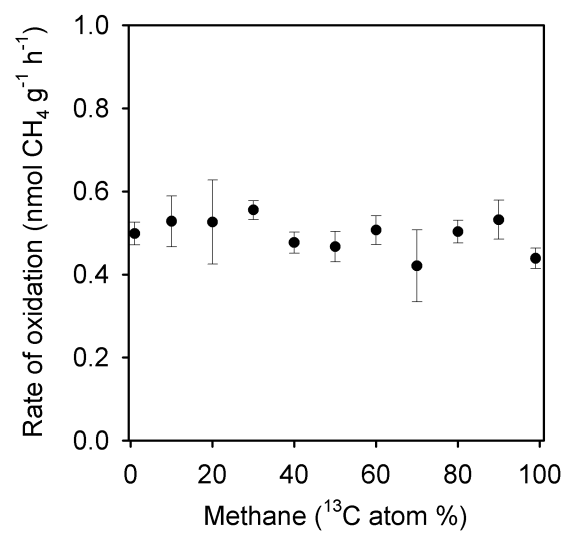

Supplement: ismej201598x4.pdf [file ismej201598x4.pdf]
